# Supplementary material for: Bridging scales: machine learning for the rational design and modelling of shape memory polymers
Source: Royal Society of Chemistry journal article supplement (doi:10.1039/d5sm00980d), 2025-12-02
Supplement: d5sm00980d1.pdf [file d5sm00980d1.pdf]

## Supplementary Materials

We have validated large language models (LLM) by using Figure 5(a) in ref <sup>1</sup>. Generally speaking, the glass transition temperature ( $T_g$ ) should be the intersection between the glassy-plateau baseline and the linear descent (transition) line. From the output of GPT-5 reported in Figure S1, we can clearly observe that it deviates from the correct results.

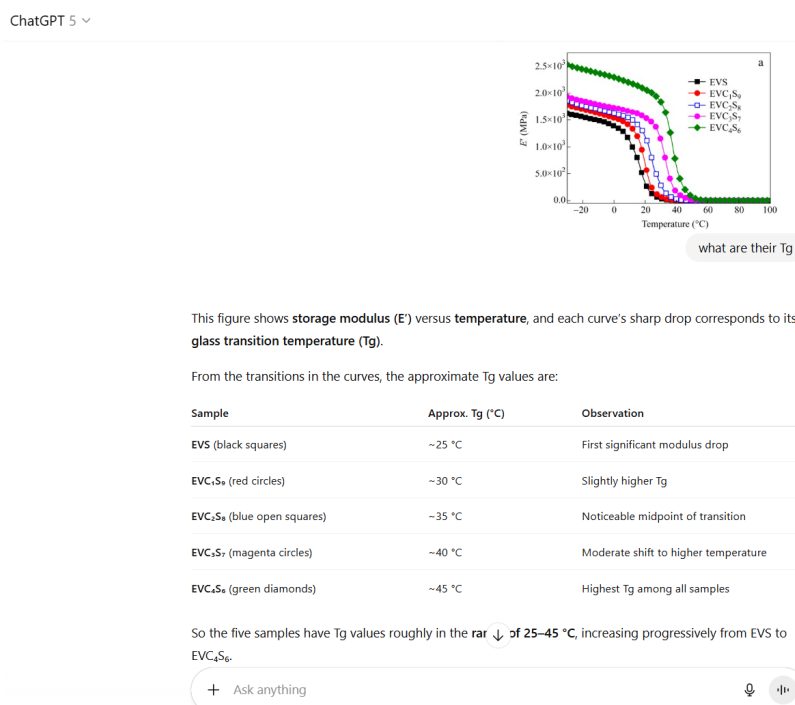

Figure S1. Readout for glass transition temperature  $T_g$  by GPT-5 model.

## Reference

- 1 J.H. Chen, X.P. An, Y.D. Li, M. Wang and J.B. Zeng, *Chinese J. Polym. Sci. (English Ed.)*, 2018, **36**, 641–648.
